# Supplementary material for: The Accuracy of Sequence-Specific Oligonucleotide and Real-Time Polymerase Chain Reaction HLA Typing in Determining the Presence of Pre-Transplant Donor-Specific Anti-HLA Antibodies and Total Eplet Mismatches for Deceased Donor Kidney Transplantation
Source: Frontiers journal article supplement (doi:10.3389/fimmu.2022.844438), 2022-06-20
Supplement: Data_Sheet_1.pdf [file Data_Sheet_1.pdf]

**Table S1** Mean class I difference and limits of agreement by donor typing method

|                                   | <b>Complete</b>     | <b>SSO</b>          | <b>rtPCR</b>        |
|-----------------------------------|---------------------|---------------------|---------------------|
| Lower limit of agreement (95% CI) | -1.3 (-1.6 to -1.1) | -0.9 (-1.0 to -0.7) | -2.0 (-2.9 to -1.1) |
| Mean difference (95% CI)          | 0.0 (-0.1 to 0.2)   | -0.1 (-0.2 to 0.0)  | 0.3 (-0.2 to 0.9)   |
| Upper limit of agreement (95% CI) | 1.4 (1.2 to 1.7)    | 0.7 (0.6 to 0.9)    | 2.7 (1.8 to 3.6)    |

*Real-time polymerase chain reaction (rtPCR); sequence-specific oligonucleotide (SSO).*

**Table S2** Mean class II difference and limits of agreement by donor typing method

|                                   | <b>Complete</b>     | <b>SSO</b>          | <b>rtPCR</b>        |
|-----------------------------------|---------------------|---------------------|---------------------|
| Lower limit of agreement (95% CI) | -4.8 (-5.7 to -3.9) | -5.1 (-6.2 to -4.0) | -4.1 (-5.7 to -2.4) |
| Mean difference (95% CI)          | 0.1 (-0.4 to 0.6)   | 0.0 (-0.6 to 0.6)   | 0.3 (-0.7 to 1.2)   |
| Upper limit of agreement (95% CI) | 5.0 (4.1 to 5.9)    | 5.1 (4.1 to 6.2)    | 4.6 (2.9 to 6.2)    |

*Real-time polymerase chain reaction (rtPCR); sequence-specific oligonucleotide (SSO).*

**Table S3** Donors with discordant HLA-typing by SSO and NGS

| <b>SSO-typing</b> | <b>NGS-typing</b> |
|-------------------|-------------------|
| DPB1*45:01,*46:01 | DPB1*02:01,*03:01 |
| DPA1*01           | DPA1*01:03,*02:01 |
| DPB1*14,*17       | DPB1*03:01,*17:01 |
| DPA1*02,*04       | DPA1*02:02        |
| DRB3*01,*02       | DRB3*02:02        |

SSO – sequence-specific oligonucleotide; NGS – Next Generation Sequencing.

**Table S4** Mean difference and limits of agreement with discordant typing removed

|                                   | <b>Class I</b>      | <b>Class II</b>     |
|-----------------------------------|---------------------|---------------------|
| Lower limit of agreement (95% CI) | -1.1 (-1.4 to -0.9) | -4.9 (-5.8 to -4.0) |
| Mean difference (95% CI)          | 0.0 (-0.1 to 0.1)   | 0.0 (-0.5 to 0.5)   |
| Upper limit of agreement (95% CI) | 1.1 (0.9 to 1.4)    | 4.9 (4.0 to 5.8)    |

Five donor/recipient pairs in Table S3 removed.

**Table S5** HLA alleles resolved by NGS not present in HLAMatchmaker

|                                                                                                                                                                                                                                                                                      |
|--------------------------------------------------------------------------------------------------------------------------------------------------------------------------------------------------------------------------------------------------------------------------------------|
| <b>Donors</b>                                                                                                                                                                                                                                                                        |
| DRB1*14:09 does not correspond with any G group, sequence alignment performed with DRB1*14:01, DRB1*14:03, DRB1*14:04, DRB1*14:08. Closest alignment with DRB1*14:02 - 1 bp difference                                                                                               |
| A*74:05 does not correspond with any G group, sequence alignment performed with A*74:01, A*74:02, A*74:03, A*74:06 and A*74:08. Closest alignment with A*74:01 - 1 bp difference                                                                                                     |
| DRB1*11:129= DRB1*11:06 does not correspond with any G group, sequence alignment performed with DRB1*011 Closest alignment with DRB1*11:06 -1 bp difference                                                                                                                          |
| DRB1*03:124 does not correspond with any G group, sequence alignment performed with DRB1*03 Closest alignment with DRB1*03:01 -1 bp difference                                                                                                                                       |
| <b>Recipients</b>                                                                                                                                                                                                                                                                    |
| DPB1*112:01 does not correspond with any G group, sequence alignment performed with DPB1*02:01, DPB1*02:02, DPB1*03:01, DPB1*04:01, DPB1*04:02, DPB1*15:01. Closest alignment with DPB1*04:01 -2 bp difference                                                                       |
| DRB1*04:12 does not correspond with any G group, sequence alignment performed with DRB1*04:01, DRB1*04:02, DRB1*04:03, DRB1*04:04, DRB1*04:05, DRB1*04:06, DRB1*04:07, DRB1*04:08, DRB1*04:09, DRB1*04:10, DRB1*04:11, DRB1*04:13 Closest alignment with DRB1*04:10 -6 bp difference |

**Table S6** Comparing the actual HLA-DR and HLA-DQ mismatched eplets identified by Next Generation Sequencing (NGS) typing and linkage disequilibrium. Examples of donors-recipient pairs where there is a disagreement (difference in predicted eplet mismatches of  $\geq 1$ ) between the two methods.

|                           | NGS | PREDICTED | DIFFERENCE<br>IN NUMBER<br>HLA-DR+DQ<br>EPLET MM | ACTUAL<br>NUMBER<br>HLA-DR+DQ<br>EPLET MM | HLA-DR EPLET MM                                                                                                                                                                                                                     | HLA-DQ EPLET MM                                                                                                                                                                                    | DONOR HLA<br>TYPING<br>METHOD |
|---------------------------|-----|-----------|--------------------------------------------------|-------------------------------------------|-------------------------------------------------------------------------------------------------------------------------------------------------------------------------------------------------------------------------------------|----------------------------------------------------------------------------------------------------------------------------------------------------------------------------------------------------|-------------------------------|
| <b>PAIR 1</b>             | 21  | 21        | 0                                                | 2                                         | 16Y*, 57S, 67F, 74L                                                                                                                                                                                                                 | 26G*, 45EV*, 52PR*, 55RL*,<br>74SV*, 70ED*, 9F, 14AM,<br>26Y, 26G, 56PD, 70ED, 66IT,<br>75IL, <b>160AD</b> , <b>160D</b>                                                                           | SSO                           |
| <b>PAIR 2<sup>#</sup></b> | 45  | 43        | 2                                                | 10                                        | 11STS*, 74R*, 77N*, 96HK*,<br>98Q*, 104A*, 67LQ*, 13SE,<br><b>28E</b> , <b>30H</b> , 32H, <b>37NV</b> , <b>37YA</b> ,<br>71K, 73G, 85VV, 96H,<br>140TV, 149H, <b>189S</b> , <b>37FL2</b> ,<br><b>57V</b> , <b>60S</b> , <b>183A</b> | 45GE*, 55LPA*, 74AVR*,<br>125A*, 40GR*, 47CL*,<br>53QF*, 75S*, 163E*, 175K*,<br>9F, 13GM, 26L, 37YA, 56PA,<br>70GT, 18S, 45VL, 61FT,<br>66IL, 76L, 80S, <b>129H</b> , 160AE                        | SSO                           |
| <b>PAIR 3<sup>#</sup></b> | 29  | 28        | 1                                                | 3                                         | 70QT*, 96EV*, 96ES*, 30C,<br>37SV, <b>37FL2</b> , 74A, <b>183A</b> ,<br><b>28E</b>                                                                                                                                                  | 26G*, 52PQ*, 56PV*,<br>52PR*, 74SR*, 74SV*,<br>85VG*, 116I*, 125S*, 14GL,<br>26G, 67VG, 85VY, 18F,<br>41RA, 52SK, 64RM, 80Y,<br>130S, 160AD                                                        | SSO                           |
| <b>PAIR 4<sup>#</sup></b> | 39  | 39        | 0                                                | 6                                         | 96EV*, 108T*, 142M*,<br>347F*, 85VG*, 96EN*,<br>104ART*, 28H, 37DL, 267I,<br>67F, 70Q, 71A, 74A, 120S,<br>133RS, 180V                                                                                                               | 52PQ*, 52PR*, 85VG*,<br>140A*, 182S*, 9F, 56PD,<br>67VG, 70GT, 125GQ, 185T,<br>18F, <b>25FT</b> , <b>41KA</b> , 52SK,<br>64RM, <b>130A</b> , 80Y, 187A,<br><b>25YT</b> , <b>41RA</b> , <b>130S</b> | rtPCR                         |
| <b>PAIR 5<sup>#</sup></b> | 40  | 40        | 0                                                | 6                                         | 4Q*, 11STS*, 18L*, 25Q*,<br>26WN*, 48Q*, 40YNL*,                                                                                                                                                                                    | 45GE*, 55LPA*, 74AVR*,<br>47KHL*, 40ERV*, 13GM,                                                                                                                                                    | SSO                           |

|                           |    |    |   |   |                                                                                                                                                                         |                                                                                                                                                                              |       |
|---------------------------|----|----|---|---|-------------------------------------------------------------------------------------------------------------------------------------------------------------------------|------------------------------------------------------------------------------------------------------------------------------------------------------------------------------|-------|
|                           |    |    |   |   | 74R*, 81Y*, 12KYK, 28D,<br><b>30Y</b> , 31I, 32Y, 37NV, <b>37FV</b> ,<br>37FL, 267I, 71E, 74E, <b>85VV</b> ,<br>98E, 183A, <b>133RS</b> , <b>140AV</b> ,<br><b>189S</b> | 26L, 56PA, 66D, 66DR,<br>70GT, 125GQ, 135G, 41KA,<br>66IL, 130A                                                                                                              |       |
| <b>PAIR 6<sup>#</sup></b> | 35 | 38 | 3 | 7 | 96EV*, 108T*, 142M*,<br>396EN*, 104ART*, 28D,<br>37SV, <b>37DL2</b> , <b>133RS</b> , <b>6C</b> ,<br><b>67I</b> , <b>70Q</b> , <b>71A</b> , <b>157I</b>                  | 26G*, 52PQ*, 52PR*, 74SR*,<br>74SV*, 77R*, 85VG*,<br>140A*, 116I*, 125S*, 182S*,<br>14GL, 26G, 56PS, 67VG,<br>75V, 85VY, 125SH, 18F,<br>25YT, 41RA, 52SK, 64RM,<br>80Y, 130S | rtPCR |
| <b>PAIR 7</b>             | 8  | 7  | 1 | 3 | 37FV, <b>57V</b> , <b>60S</b> , <b>28E</b>                                                                                                                              | 56PV*, 70RT, 85VY, 86G,<br>130Q                                                                                                                                              |       |

*<sup>#</sup>denotes recipients of Asian ethnicity, \*denotes mismatched eplet with high risk of immunisation defined by both SSO/rtPCR and NGS, **red bold colour** denotes mismatched eplet identified by NGS method only and **bold blue colour** denotes mismatched eplet identified by linkage disequilibrium method only*

**Figure S1** Bland Altman Plot – total HLA class I eplet mismatches – SSO donor HLA typing

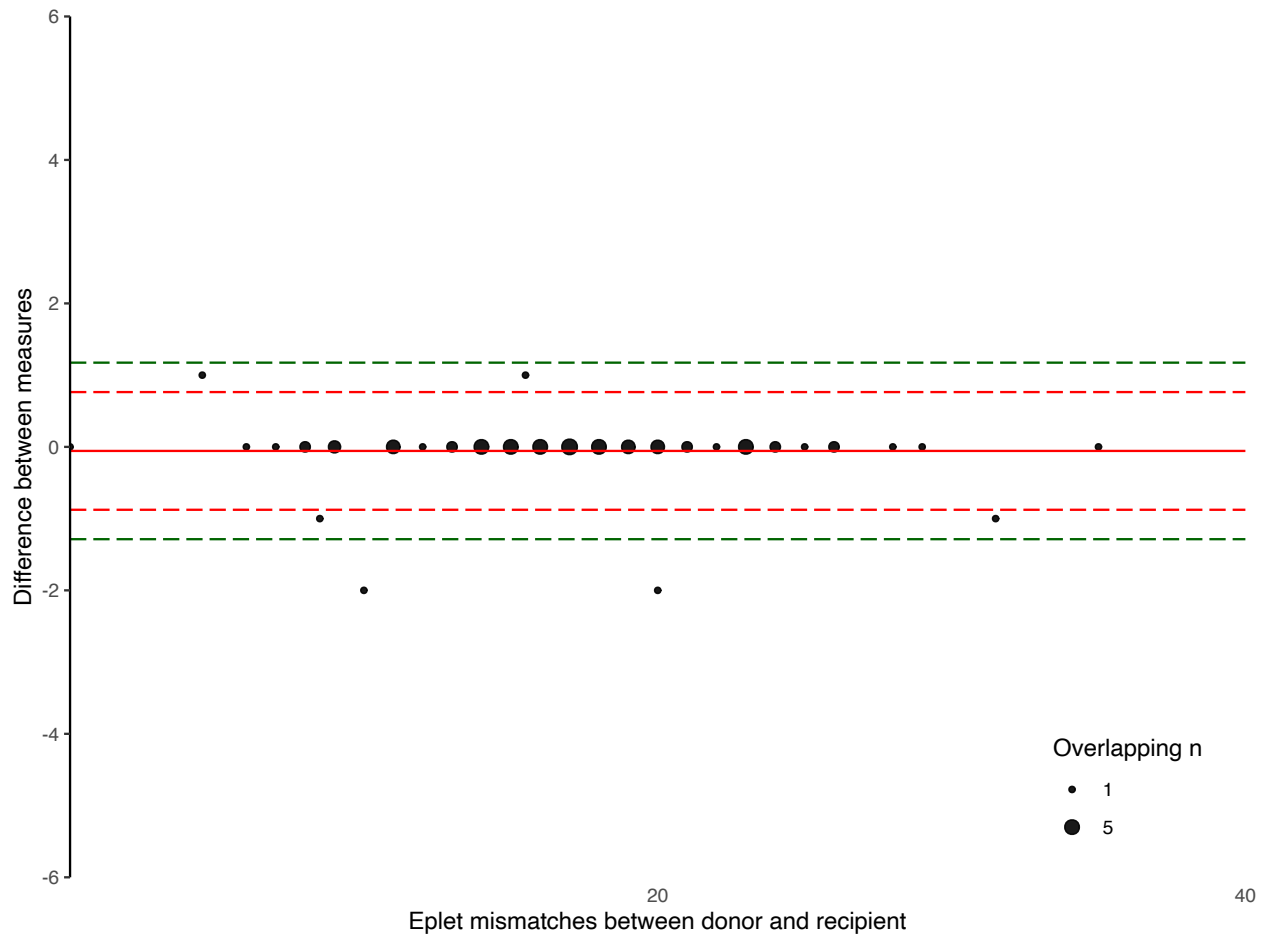

A positive result indicates a greater number of eplet mismatches identified by NGS-typing compared to LD-typing. The red and green dashed lines represent 2 and 3 standard deviations from mean respectively.

**Figure S2** Bland Altman Plot – total HLA class II eplet mismatches – SSO donor HLA typing

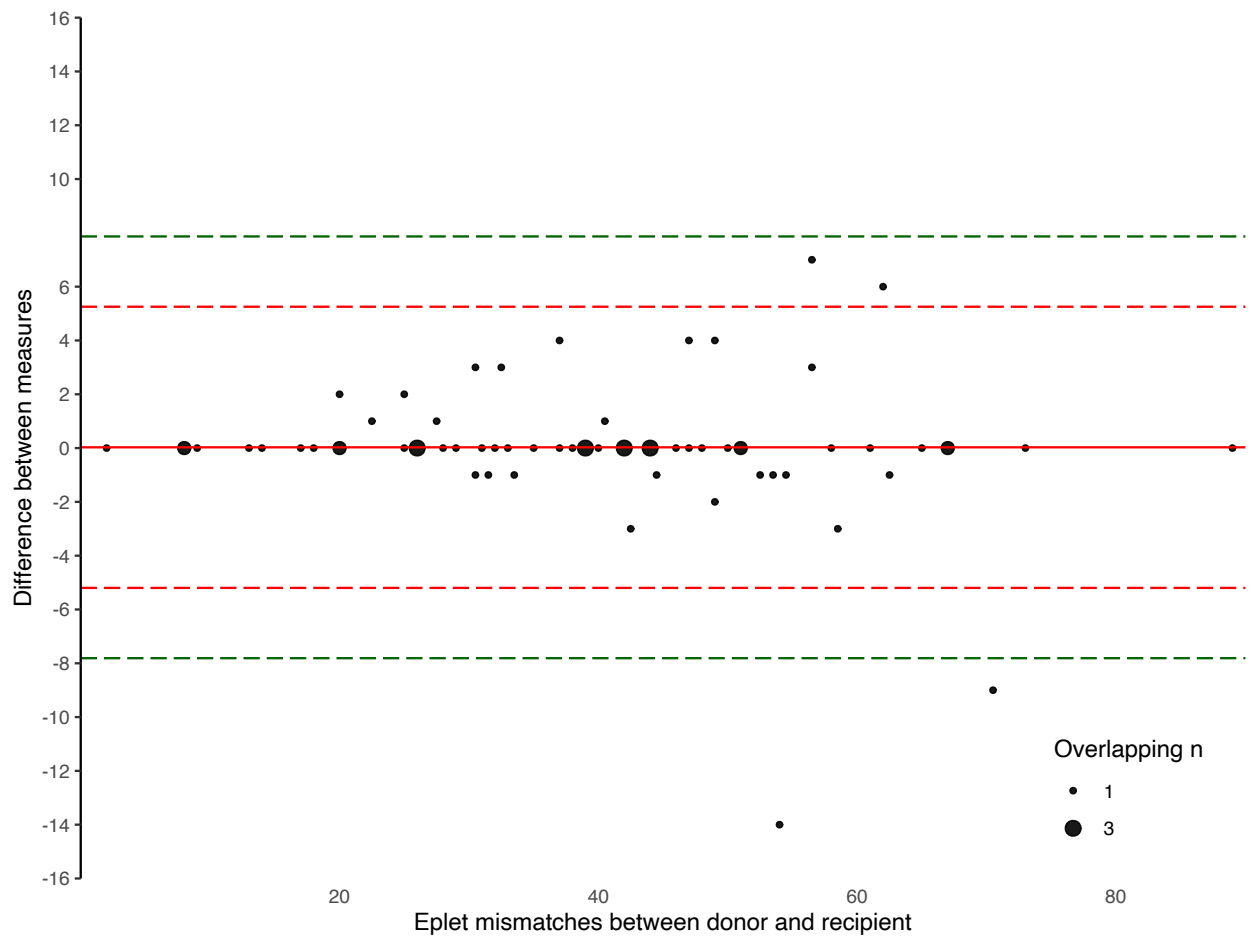

A positive result indicates a greater number of eplet mismatches identified by NGS-typing compared to LD-typing. The red and green dashed lines represent 2 and 3 standard deviations from mean respectively.

**Figure S3** Bland Altman Plot – total HLA class I eplet mismatches – rtPCR donor HLA typing

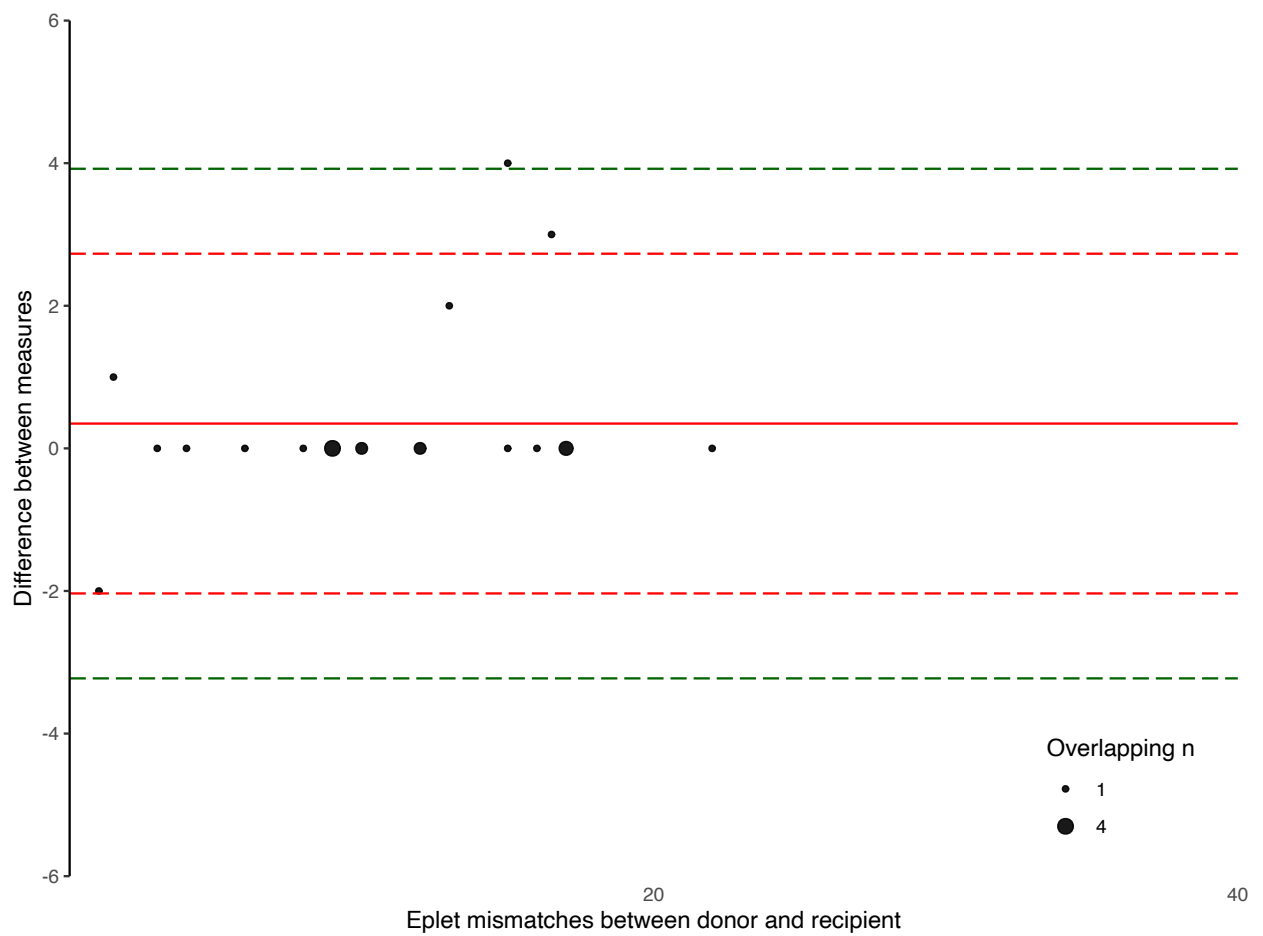

A positive result indicates a greater number of eplet mismatches identified by NGS-typing compared to LD-typing. The red and green dashed lines represent 2 and 3 standard deviations from mean respectively.

**Figure S4** Bland Altman Plot – total HLA class II eplet mismatches – rtPCR donor HLA typing

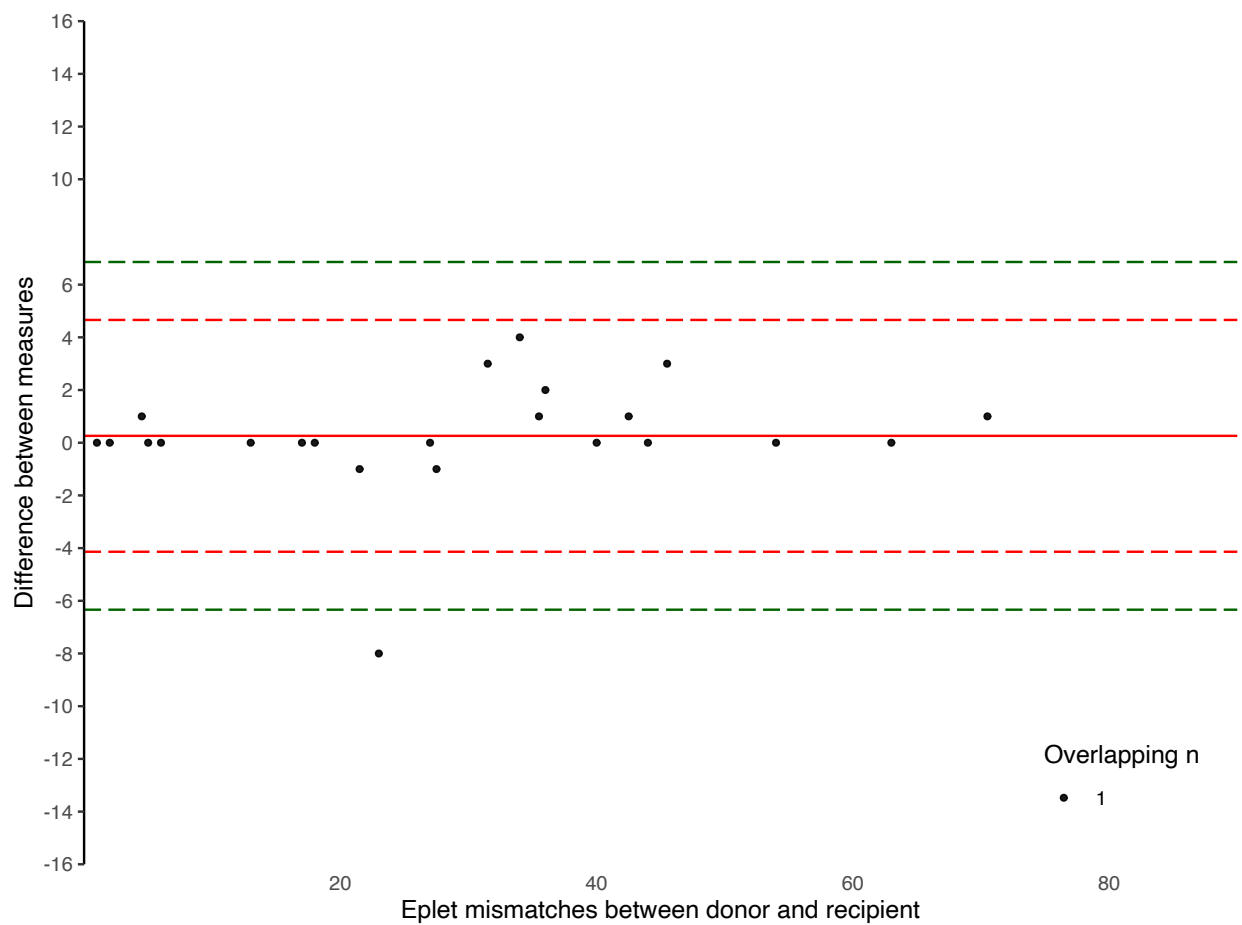

A positive result indicates a greater number of eplet mismatches identified by NGS-typing compared to LD-typing. The red and green dashed lines represent 2 and 3 standard deviations from mean respectively.
